# Supplementary material for: Decreasing incidence of pharmacologically and non-pharmacologically treated type 2 diabetes in Norway: a nationwide study
Source: PubMed Central journal article supplement (PMC6182655; doi:10.1007/s00125-018-4681-4), 2018-07-11
Supplement: 125_2018_4681_MOESM1_ESM.pdf [file 125_2018_4681_MOESM1_ESM.pdf]

## Electronic supplementary material (ESM)

### Decreasing Incidence of Pharmacologically and Non-Pharmacologically Treated Type 2 Diabetes in Norway 2009-2014

#### ESM Methods

##### Interrupted times series model

From September 2012, HbA1c was recommended for type 2 diabetes diagnosis in Norway. We used interrupted time series analysis to evaluate the potential effect of this recommendation on the time trends in incidence of diagnosed type 2 diabetes in Norway. While the model for estimating the overall average percent change per year was a Poisson regression model with only calendar year as a continuous explanatory variable, we evaluated the potential change in level and slope after September 2012 by also introducing 1) a dummy variable for the time period after September 2012 (taking the value zero before Sep 2012 and 1 from Sep 2012 to study end) representing change in level and 2) an interaction (multiplication) term between the dummy variable and the linear term to represent change in slope after September 2012. The model results and predictions are presented in ESM Figure 6.

## ESM Tables

**ESM Table 1.** Time trends, by treatment, in the proportion of people with diagnosed type 2 diabetes aged 30-89 years from 2009 to 2014.

| <b>Pharmacologically treated</b> |             |                   |                        |                       |
|----------------------------------|-------------|-------------------|------------------------|-----------------------|
| <b>Age groups</b>                | <b>Year</b> | <b>Population</b> | <b>Prevalent cases</b> | <b>Prevalence (%)</b> |
| <b>Men</b>                       |             |                   |                        |                       |
| 30-49                            | 2009        | 770,828           | 8,570                  | 1.11                  |
| 50-69                            |             | 578,191           | 33,334                 | 5.77                  |
| 70-89                            |             | 215,037           | 20,940                 | 9.74                  |
| Total                            |             | 1,564,056         | 62,844                 | 4.02                  |
| 30-49                            | 2010        | 769,027           | 9,162                  | 1.19                  |
| 50-69                            |             | 588,642           | 36,684                 | 6.23                  |
| 70-89                            |             | 217,562           | 22,758                 | 10.5                  |
| Total                            |             | 1,575,231         | 68,604                 | 4.36                  |
| 30-49                            | 2011        | 766,599           | 9,711                  | 1.27                  |
| 50-69                            |             | 600,199           | 39,276                 | 6.54                  |
| 70-89                            |             | 219,488           | 24,066                 | 11.0                  |
| Total                            |             | 1,586,286         | 73,053                 | 4.61                  |
| 30-49                            | 2012        | 763,959           | 10,188                 | 1.33                  |
| 50-69                            |             | 609,623           | 41,550                 | 6.82                  |
| 70-89                            |             | 223,926           | 25,598                 | 11.4                  |
| Total                            |             | 1,597,508         | 77,336                 | 4.84                  |
| 30-49                            | 2013        | 759,289           | 10,546                 | 1.39                  |
| 50-69                            |             | 617,319           | 43,402                 | 7.03                  |
| 70-89                            |             | 230,340           | 27,420                 | 11.9                  |
| Total                            |             | 1,606,948         | 81,368                 | 5.06                  |
| 30-49                            | 2014        | 750,424           | 10,785                 | 1.44                  |
| 50-69                            |             | 623,214           | 44,918                 | 7.21                  |
| 70-89                            |             | 239,516           | 29,773                 | 12.4                  |
| Total                            |             | 1,613,154         | 85,476                 | 5.30                  |
| <b>Women</b>                     |             |                   |                        |                       |
| 30-49                            | 2009        | 710,899           | 6,370                  | 0.90                  |
| 50-69                            |             | 563,503           | 21,580                 | 3.83                  |
| 70-89                            |             | 287,073           | 22,243                 | 7.75                  |
| Total                            |             | 1,561,475         | 50,193                 | 3.21                  |
| 30-49                            | 2010        | 711,017           | 6,912                  | 0.97                  |
| 50-69                            |             | 573,139           | 23,516                 | 4.10                  |
| 70-89                            |             | 285,690           | 23,537                 | 8.24                  |
| Total                            |             | 1,569,846         | 53,965                 | 3.44                  |
| 30-49                            | 2011        | 710,212           | 7,309                  | 1.03                  |
| 50-69                            |             | 583,557           | 25,091                 | 4.30                  |
| 70-89                            |             | 284,512           | 24,314                 | 8.55                  |
| Total                            |             | 1,578,281         | 56,714                 | 3.59                  |
| 30-49                            | 2012        | 709,186           | 7,652                  | 1.08                  |
| 50-69                            |             | 591,864           | 26,328                 | 4.45                  |
| 70-89                            |             | 286,162           | 25,279                 | 8.83                  |
| Total                            |             | 1,587,212         | 59,259                 | 3.73                  |
| 30-49                            | 2013        | 705,967           | 7,863                  | 1.11                  |
| 50-69                            |             | 599,425           | 27,425                 | 4.58                  |
| 70-89                            |             | 289,270           | 26,048                 | 9.00                  |
| Total                            |             | 1,594,662         | 61,336                 | 3.85                  |
| 30-49                            | 2014        | 701,206           | 8,150                  | 1.16                  |
| 50-69                            |             | 605,083           | 28,324                 | 4.68                  |
| 70-89                            |             | 295,505           | 27,107                 | 9.17                  |
| Total                            |             | 1,601,794         | 63,581                 | 3.97                  |

| <b>Non-pharmacologically treated</b> |             |                   |                        |                       |
|--------------------------------------|-------------|-------------------|------------------------|-----------------------|
| <b>Age groups</b>                    | <b>Year</b> | <b>Population</b> | <b>Prevalent cases</b> | <b>Prevalence (%)</b> |
| <b>Men</b>                           |             |                   |                        |                       |
| 30-49                                | 2009        | 770,828           | 2,493                  | 0.32                  |
| 50-69                                |             | 578,191           | 11,069                 | 1.91                  |
| 70-89                                |             | 215,037           | 7,606                  | 3.54                  |
| Total                                |             | 1,564,056         | 21,168                 | 1.35                  |
| 30-49                                | 2010        | 769,027           | 2,672                  | 0.35                  |
| 50-69                                |             | 588,642           | 12,145                 | 2.06                  |
| 70-89                                |             | 217,562           | 8,408                  | 3.86                  |
| Total                                |             | 1,575,231         | 23,225                 | 1.47                  |
| 30-49                                | 2011        | 766,599           | 2,768                  | 0.36                  |
| 50-69                                |             | 600,199           | 12,717                 | 2.12                  |
| 70-89                                |             | 219,488           | 8,912                  | 4.06                  |
| Total                                |             | 1,586,286         | 24,397                 | 1.54                  |
| 30-49                                | 2012        | 763,959           | 2,730                  | 0.36                  |
| 50-69                                |             | 609,623           | 12,885                 | 2.11                  |
| 70-89                                |             | 223,926           | 9,449                  | 4.22                  |
| Total                                |             | 1,597,508         | 25,064                 | 1.57                  |
| 30-49                                | 2013        | 759,289           | 2,657                  | 0.35                  |
| 50-69                                |             | 617,319           | 12,676                 | 2.05                  |
| 70-89                                |             | 230,340           | 9,708                  | 4.21                  |
| Total                                |             | 1,606,948         | 25,041                 | 1.56                  |
| 30-49                                | 2014        | 750,424           | 2,465                  | 0.33                  |
| 50-69                                |             | 623,214           | 11,844                 | 1.90                  |
| 70-89                                |             | 239,516           | 9,748                  | 4.07                  |
| Total                                |             | 1,613,154         | 24,057                 | 1.49                  |
| <b>Women</b>                         |             |                   |                        |                       |
| 30-49                                | 2009        | 710,899           | 2,108                  | 0.30                  |
| 50-69                                |             | 563,503           | 8,430                  | 1.50                  |
| 70-89                                |             | 287,073           | 9,315                  | 3.24                  |
| Total                                |             | 1,561,475         | 19,853                 | 1.27                  |
| 30-49                                | 2010        | 711,017           | 2,226                  | 0.31                  |
| 50-69                                |             | 573,139           | 9,131                  | 1.59                  |
| 70-89                                |             | 285,690           | 10,074                 | 3.53                  |
| Total                                |             | 1,569,846         | 21,431                 | 1.37                  |
| 30-49                                | 2011        | 710,212           | 2,327                  | 0.33                  |
| 50-69                                |             | 583,557           | 9,476                  | 1.62                  |
| 70-89                                |             | 284,512           | 10,466                 | 3.68                  |
| Total                                |             | 1,578,281         | 22,269                 | 1.41                  |
| 30-49                                | 2012        | 709,186           | 2,307                  | 0.33                  |
| 50-69                                |             | 591,864           | 9,539                  | 1.61                  |
| 70-89                                |             | 286,162           | 10,817                 | 3.78                  |
| Total                                |             | 1,587,212         | 22,663                 | 1.43                  |
| 30-49                                | 2013        | 705,967           | 2,242                  | 0.32                  |
| 50-69                                |             | 599,425           | 9,379                  | 1.56                  |
| 70-89                                |             | 289,270           | 10,946                 | 3.78                  |
| Total                                |             | 1,594,662         | 22,567                 | 1.42                  |
| 30-49                                | 2014        | 701,206           | 2,079                  | 0.30                  |
| 50-69                                |             | 605,083           | 8,914                  | 1.47                  |
| 70-89                                |             | 295,505           | 10,946                 | 3.70                  |
| Total                                |             | 1,601,794         | 21,939                 | 1.37                  |

**ESM Table 2.** Incidence rates per 100.000 person-years of diagnosed type 2 diabetes by sex and age groups for individuals pharmacologically treated and non-pharmacologically treated.

| <b>Incidence rates (IR) in pharmacologically treated type 2 diabetes</b> |                  |                 |                     |                                            |
|--------------------------------------------------------------------------|------------------|-----------------|---------------------|--------------------------------------------|
| <b>Year</b>                                                              | <b>Age group</b> | <b>No cases</b> | <b>Person-years</b> | <b>IR per 100,000 person years (95%CI)</b> |
| <b>Men</b>                                                               |                  |                 |                     |                                            |
| 2009                                                                     | 30-49            | 1175            | 678915              | 173.1 (163.5, 183.3)                       |
|                                                                          | 50-69            | 2468            | 506404              | 487.4 (468.5, 507.0)                       |
|                                                                          | 70-89            | 919             | 170512              | 539.0 (505.2, 575.0)                       |
|                                                                          | Total            | 4562            | 1,355,830           | 336.5 (326.8, 346.4)                       |
| 2010                                                                     | 30-49            | 1154            | 682859              | 169.0 (159.5, 179.0)                       |
|                                                                          | 50-69            | 2312            | 513634              | 450.1 (432.1, 468.9)                       |
|                                                                          | 70-89            | 849             | 170690              | 497.4 (465.0, 532.0)                       |
|                                                                          | Total            | 4315            | 1,367,183           | 315.6 (306.3, 325.2)                       |
| 2011                                                                     | 30-49            | 1114            | 687866              | 162.0 (152.7, 171.7)                       |
|                                                                          | 50-69            | 2098            | 521626              | 402.2 (385.4, 419.8)                       |
|                                                                          | 70-89            | 682             | 170788              | 399.3 (370.5, 430.4)                       |
|                                                                          | Total            | 3894            | 1,380,280           | 282.1 (273.4, 291.1)                       |
| 2012                                                                     | 30-49            | 1097            | 696615              | 157.5 (148.4, 167.1)                       |
|                                                                          | 50-69            | 2062            | 531646              | 387.9 (371.5, 405.0)                       |
|                                                                          | 70-89            | 638             | 172738              | 369.3 (341.8, 399.1)                       |
|                                                                          | Total            | 3797            | 1,400,999           | 271.0 (262.5, 279.8)                       |
| 2013                                                                     | 30-49            | 1073            | 700689              | 153.1 (144.2, 162.6)                       |
|                                                                          | 50-69            | 2002            | 537507              | 372.5 (356.5, 389.1)                       |
|                                                                          | 70-89            | 599             | 175484              | 341.3 (315.1, 369.8)                       |
|                                                                          | Total            | 3674            | 1,413,680           | 259.9 (251.6, 268.4)                       |
| 2014                                                                     | 30-49            | 545             | 348601              | 156.3 (143.7, 170.0)                       |
|                                                                          | 50-69            | 1048            | 268060              | 391.0 (368.0, 415.4)                       |
|                                                                          | 70-89            | 333             | 88799               | 375.0 (336.8, 417.5)                       |
|                                                                          | Total            | 1926            | 705460              | 273.0 (261.1, 285.5)                       |
| <b>Women</b>                                                             |                  |                 |                     |                                            |
| 2009                                                                     | 30-49            | 647             | 648215              | 99.8 (92.4, 107.8)                         |
|                                                                          | 50-69            | 1541            | 513280              | 300.2 (285.6, 315.6)                       |
|                                                                          | 70-89            | 902             | 239006              | 377.4 (353.6, 402.8)                       |
|                                                                          | Total            | 3090            | 1,400,501           | 220.6 (213.0, 228.6)                       |
| 2010                                                                     | 30-49            | 657             | 650035              | 101.1 (93.6, 109.1)                        |
|                                                                          | 50-69            | 1461            | 520310              | 280.8 (266.8, 295.6)                       |
|                                                                          | 70-89            | 831             | 236600              | 351.2 (328.1, 375.9)                       |
|                                                                          | Total            | 2949            | 1,406,945           | 209.6 (202.2, 217.3)                       |
| 2011                                                                     | 30-49            | 606             | 652472              | 92.9 (85.8, 100.6)                         |
|                                                                          | 50-69            | 1264            | 528320              | 239.2 (226.4, 252.8)                       |
|                                                                          | 70-89            | 614             | 234127              | 262.3 (242.3, 283.8)                       |
|                                                                          | Total            | 2484            | 1,414,919           | 175.6 (168.8, 182.6)                       |
| 2012                                                                     | 30-49            | 573             | 657132              | 87.2 (80.3, 94.6)                          |
|                                                                          | 50-69            | 1263            | 537696              | 234.9 (222.3, 248.2)                       |
|                                                                          | 70-89            | 579             | 234074              | 247.4 (228.0, 268.3)                       |
|                                                                          | Total            | 2415            | 1,428,903           | 169.0 (162.4, 175.9)                       |
| 2013                                                                     | 30-49            | 486             | 657526              | 73.9 (67.6, 80.8)                          |
|                                                                          | 50-69            | 1082            | 543438              | 199.1 (187.6, 211.3)                       |
|                                                                          | 70-89            | 528             | 234760              | 224.9 (206.5, 244.9)                       |
|                                                                          | Total            | 2096            | 1,435,724           | 146.0 (139.9, 152.4)                       |
| 2014                                                                     | 30-49            | 252             | 326202              | 77.3 (68.3, 87.4)                          |
|                                                                          | 50-69            | 620             | 270937              | 228.8 (211.5, 247.6)                       |
|                                                                          | 70-89            | 260             | 117520              | 221.2 (195.9, 249.8)                       |
|                                                                          | Total            | 1132            | 714659              | 158.4 (149.4, 167.9)                       |

| <b>Incidence rates (IR) in non-pharmacologically treated type 2 diabetes</b> |                  |                 |                     |                                            |
|------------------------------------------------------------------------------|------------------|-----------------|---------------------|--------------------------------------------|
| <b>Year</b>                                                                  | <b>Age group</b> | <b>No cases</b> | <b>Person-years</b> | <b>IR per 100,000 person years (95%CI)</b> |
| <b>Men</b>                                                                   |                  |                 |                     |                                            |
| 2009                                                                         | 30-49            | 791             | 678,915             | 116.5 (108.7, 124.9)                       |
|                                                                              | 50-69            | 2785            | 506,404             | 550.0 (529.9, 570.8)                       |
|                                                                              | 70-89            | 1354            | 170,512             | 794.1 (752.9, 837.5)                       |
|                                                                              | Total            | 4930            | 1,355,830           | 363.6 (353.6, 373.9)                       |
| 2010                                                                         | 30-49            | 771             | 682,859             | 112.9 (105.2, 121.2)                       |
|                                                                              | 50-69            | 2741            | 513,634             | 533.6 (514.0, 554.0)                       |
|                                                                              | 70-89            | 1333            | 170,690             | 780.9 (740.1, 824.0)                       |
|                                                                              | Total            | 4845            | 1,367,183           | 354.4 (344.5, 364.5)                       |
| 2011                                                                         | 30-49            | 721             | 687,866             | 104.8 (97.4, 112.8)                        |
|                                                                              | 50-69            | 2285            | 521,626             | 438.1 (420.5, 456.4)                       |
|                                                                              | 70-89            | 998             | 170,787             | 584.4 (549.2, 621.8)                       |
|                                                                              | Total            | 4004            | 1,380,280           | 290.1 (281.2, 299.2)                       |
| 2012                                                                         | 30-49            | 650             | 696,615             | 93.3 (86.4, 100.8)                         |
|                                                                              | 50-69            | 1909            | 531,646             | 359.1 (343.3, 375.5)                       |
|                                                                              | 70-89            | 911             | 172,738             | 527.4 (494.2, 562.8)                       |
|                                                                              | Total            | 3470            | 1,400,999           | 247.7 (239.6, 256.1)                       |
| 2013                                                                         | 30-49            | 571             | 700,689             | 81.5 (75.1, 88.5)                          |
|                                                                              | 50-69            | 1720            | 537,507             | 320.0 (305.2, 335.5)                       |
|                                                                              | 70-89            | 690             | 175,484             | 393.2 (364.9, 423.7)                       |
|                                                                              | Total            | 2981            | 1,413,680           | 210.9 (203.4, 218.6)                       |
| 2014                                                                         | 30-49            | 296             | 348,601             | 84.9 (75.8, 95.2)                          |
|                                                                              | 50-69            | 852             | 268,060             | 317.8 (297.2, 339.9)                       |
|                                                                              | 70-89            | 342             | 88,799              | 385.1 (346.4, 428.2)                       |
|                                                                              | Total            | 1490            | 705,460             | 211.2 (200.8, 222.2)                       |
| <b>Women</b>                                                                 |                  |                 |                     |                                            |
| 2009                                                                         | 30-49            | 614             | 648,215             | 94.7 (87.5, 102.5)                         |
|                                                                              | 50-69            | 2013            | 513,280             | 392.2 (375.4, 409.7)                       |
|                                                                              | 70-89            | 1572            | 239,006             | 657.7 (626.0, 691.1)                       |
|                                                                              | Total            | 4199            | 1,400,501           | 299.8 (290.9, 309.0)                       |
| 2010                                                                         | 30-49            | 573             | 650,035             | 88.1 (81.2, 95.7)                          |
|                                                                              | 50-69            | 1944            | 520,310             | 373.6 (357.4, 390.6)                       |
|                                                                              | 70-89            | 1449            | 236,600             | 612.4 (581.7, 644.8)                       |
|                                                                              | Total            | 3966            | 1,406,945           | 281.9 (273.2, 290.8)                       |
| 2011                                                                         | 30-49            | 524             | 652,472             | 80.3 (73.7, 87.5)                          |
|                                                                              | 50-69            | 1608            | 528,320             | 304.4 (289.8, 319.6)                       |
|                                                                              | 70-89            | 1067            | 234,127             | 455.7 (429.2, 483.9)                       |
|                                                                              | Total            | 3199            | 1,414,919           | 226.1 (218.4, 234.1)                       |
| 2012                                                                         | 30-49            | 468             | 657,132             | 71.2 (65.0, 78.0)                          |
|                                                                              | 50-69            | 1366            | 537,696             | 254.0 (240.9, 267.9)                       |
|                                                                              | 70-89            | 879             | 234,074             | 375.5 (351.5, 401.2)                       |
|                                                                              | Total            | 2713            | 1,428,903           | 189.9 (182.9, 197.1)                       |
| 2013                                                                         | 30-49            | 386             | 657,526             | 58.7 (53.1, 64.9)                          |
|                                                                              | 50-69            | 1191            | 543,438             | 219.2 (207.1, 232.0)                       |
|                                                                              | 70-89            | 691             | 234,760             | 294.3 (273.2, 317.1)                       |
|                                                                              | Total            | 2268            | 1,435,724           | 158.0 (151.6, 164.6)                       |
| 2014                                                                         | 30-49            | 180             | 326,202             | 55.2 (47.7, 63.9)                          |
|                                                                              | 50-69            | 602             | 270,937             | 222.2 (205.1, 240.7)                       |
|                                                                              | 70-89            | 315             | 117,520             | 268.0 (240.0, 299.3)                       |
|                                                                              | Total            | 1097            | 714,659             | 153.5 (144.7, 162.9)                       |

**ESM Table 3.** Initial treatment (first month) of newly diagnosed type 2 diabetic patients in Norway 2009-2014. \*Incidence estimates until 30<sup>th</sup> June 2014, to allow ascertainment for 6 months with or without A10 medication, we stopped follow-up time 6 months before end of study period.

| <b>Blood-glucose lowering medication</b>      | <b>Number of individuals (Total %)</b> | <b>2009</b>  | <b>2010</b>  | <b>2011</b>  | <b>2012</b>  | <b>2013</b>  | <b>2014*</b> |
|-----------------------------------------------|----------------------------------------|--------------|--------------|--------------|--------------|--------------|--------------|
| Metformin                                     | 30,024 (82.6)                          | 5,942 (80.6) | 6,015 (82.7) | 5,403 (84.1) | 5,191 (83.6) | 4,769 (82.3) | 2,704 (82.9) |
| Sulfonylureas                                 | 1,586 (4.4)                            | 602 (8.2)    | 376 (5.2)    | 235 (3.7)    | 175 (2.8)    | 138 (2.4)    | 60 (1.8)     |
| Insulin only                                  | 340 (0.9)                              | 64 (0.9)     | 55 (0.8)     | 46 (0.7)     | 70 (1.1)     | 68 (1.2)     | 37 (1.1)     |
| DPP-4 inhibitors                              | 223 (0.6)                              | 6 (0.1)      | 24 (0.3)     | 30 (0.5)     | 50 (0.8)     | 63 (1.1)     | 50 (1.5)     |
| Insulin + Metformin                           | 1,480 (4.1)                            | 262 (3.5)    | 302 (4.1)    | 239 (3.7)    | 283 (4.6)    | 257 (4.4)    | 137 (4.2)    |
| Metformin + Sulfonylureas                     | 1,315 (3.6)                            | 389 (5.3)    | 312 (4.3)    | 206 (3.2)    | 193 (3.1)    | 159 (2.8)    | 56 (1.7)     |
| Other drugs in monotherapy                    | 96 (0.3)                               | 7 (0.1)      | 11 (0.2)     | 21 (0.3)     | 12 (0.2)     | 30 (0.5)     | 15 (0.5)     |
| Other combination therapy (including insulin) | 1,270 (3.4)                            | 104 (1.3)    | 176 (2.4)    | 245 (3.8)    | 233 (3.8)    | 308 (5.3)    | 204 (6.2)    |
| <b>TOTAL</b>                                  | <b>36,334</b>                          | <b>7,376</b> | <b>7,271</b> | <b>6,425</b> | <b>6,207</b> | <b>5,792</b> | <b>3,263</b> |

# ESM Figures

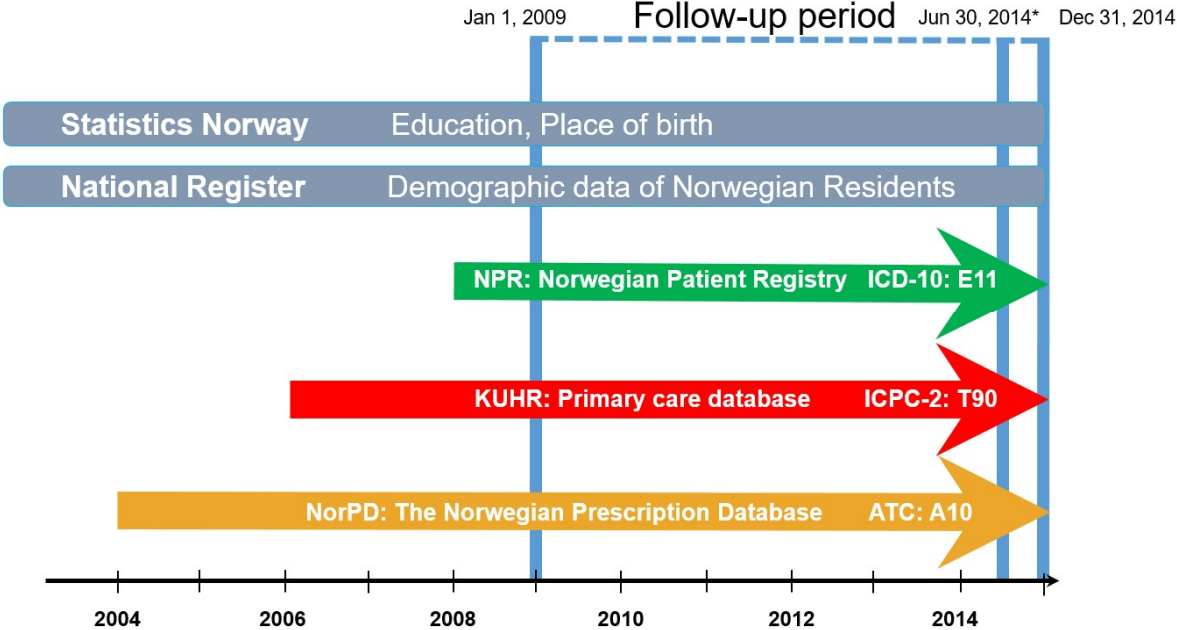

**ESM Fig. 1.** Registers included in the linkage and their follow up period.

\*Data available until December 31st, 2014, to allow ascertainment for 6 months with or without A10 medication in the incidence analysis, we stopped follow-up time 6 months before end of study period.

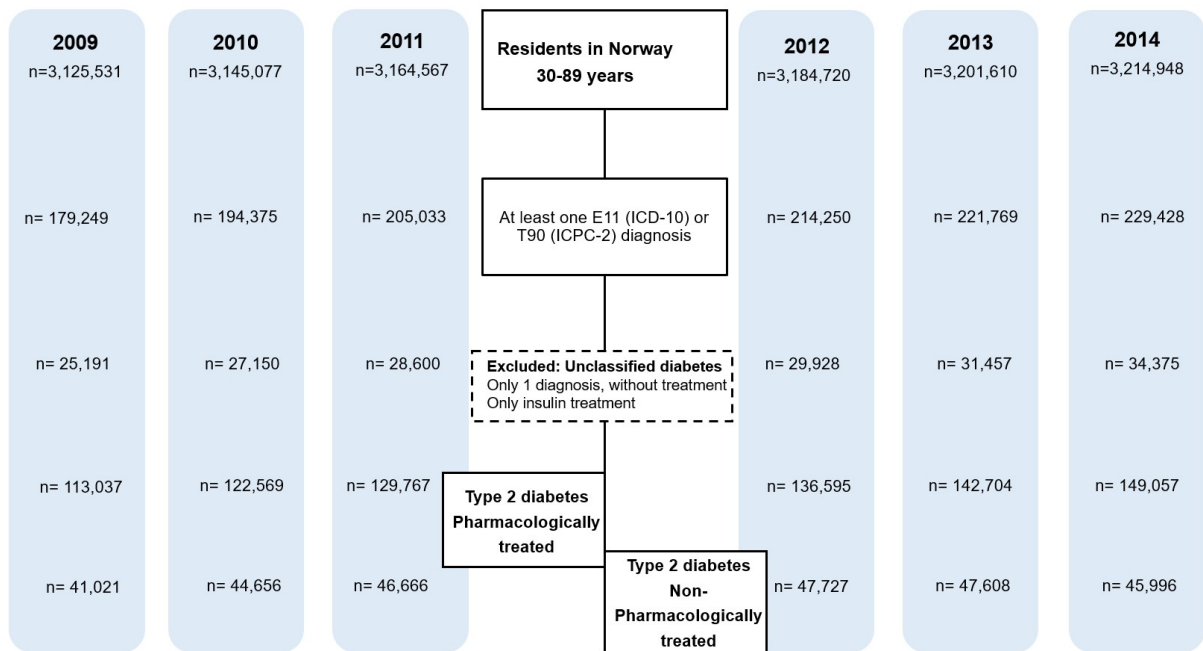

**ESM Fig. 2.** Flow chart of the study population included in the analysis of type 2 diabetes prevalence. Individuals were diagnosed at any time during the current calendar year or before (and still alive and resident) in the current year.



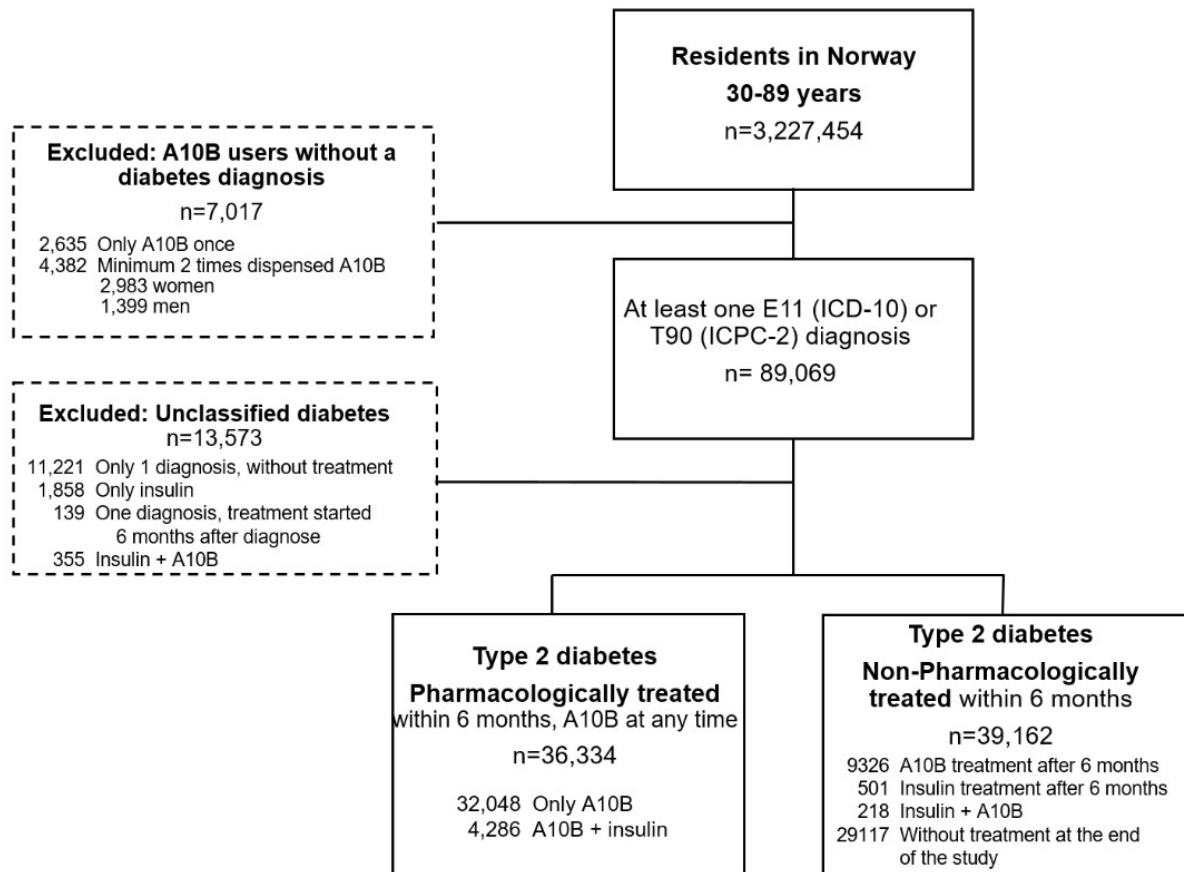

**ESM Fig. 3.** Flow chart of the study population. This is an open cohort; we follow individuals 30 to 89 years, from January 1st, 2009 until June 30<sup>th</sup>, 2014. We classified individuals as pharmacologically treated within 6 months after diagnosis (minimum one type 2 diabetes diagnosis and use of glucose lowering medication) and non-pharmacologically treated within 6 months and at least two type 2 diabetes diagnoses. Those not meeting the criteria were excluded as noted “Unclassified”. Some individuals using only non-insulin glucose lowering medication (A10B), but not registered with a type 2 diagnosis, were also excluded.

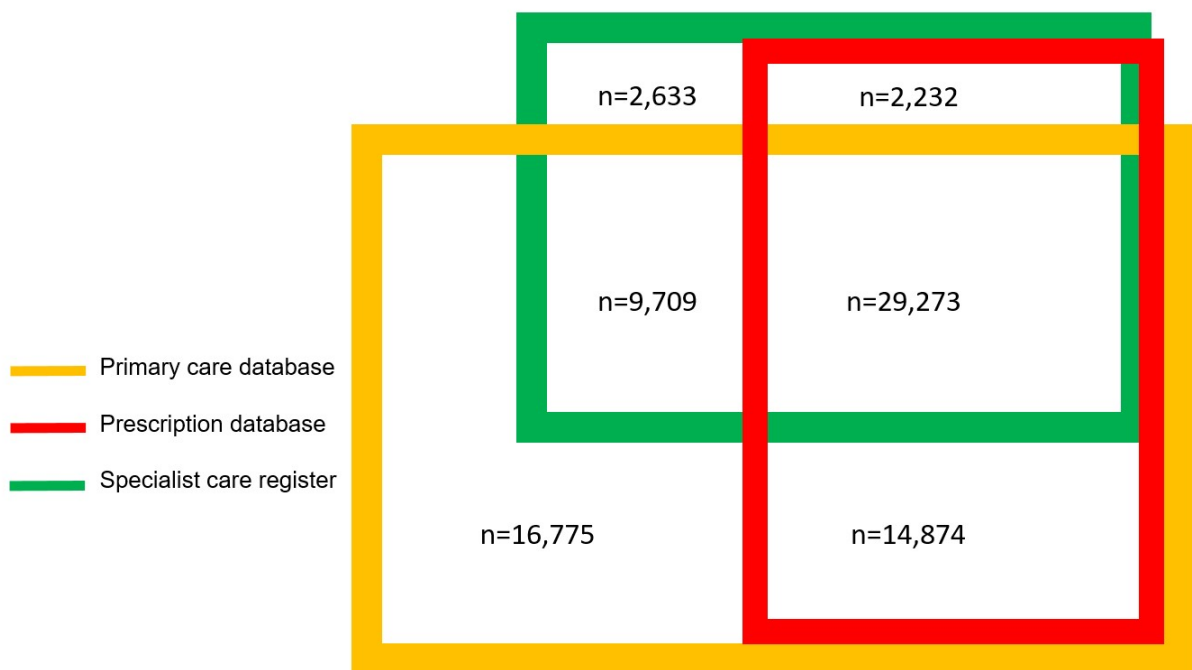

**ESM Fig. 4.** Number of incident type 2 diabetes cases included in each register, 39% of all incident cases were recorded in the 3 health registers, 36% in 2 registers and 26% in 1 register with at least two registrations of a type 2 diabetes diagnosis.

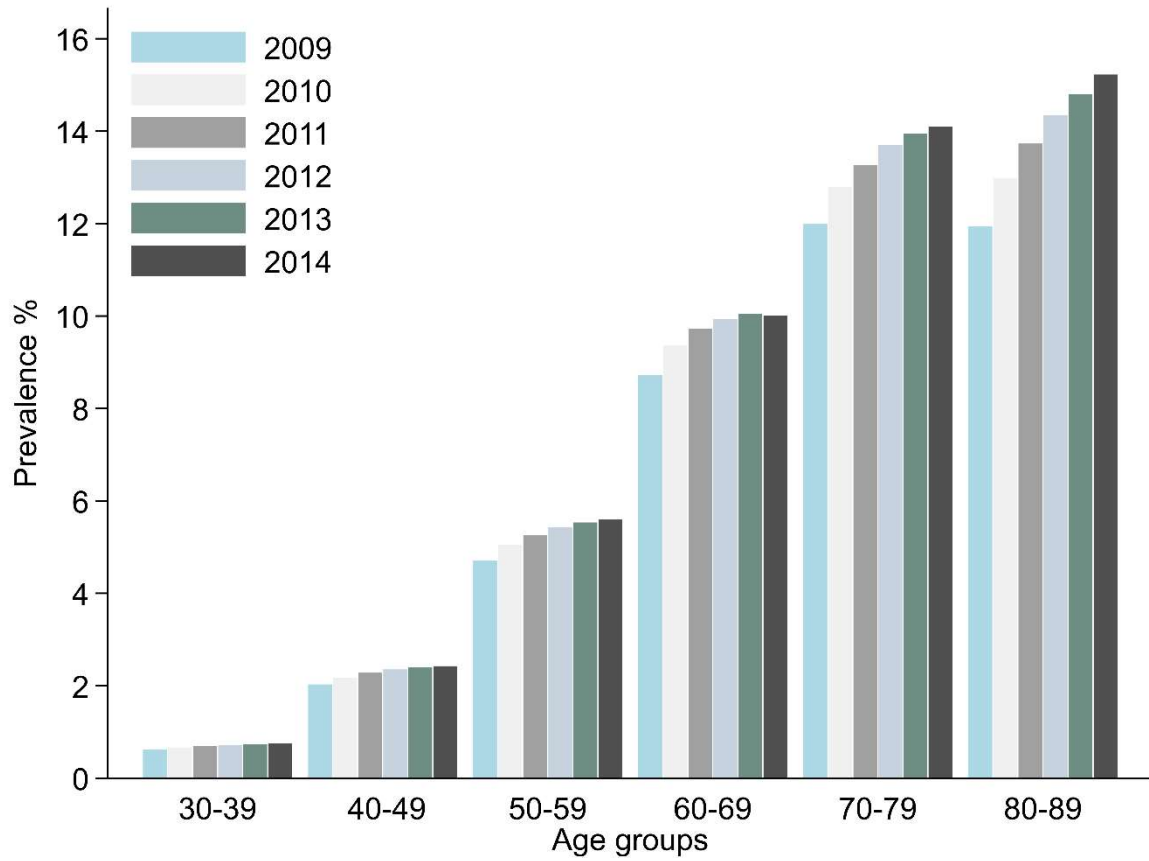

**ESM Fig. 5.** Prevalence trends in type 2 diabetes from 2009 to 2014, by age groups (years).

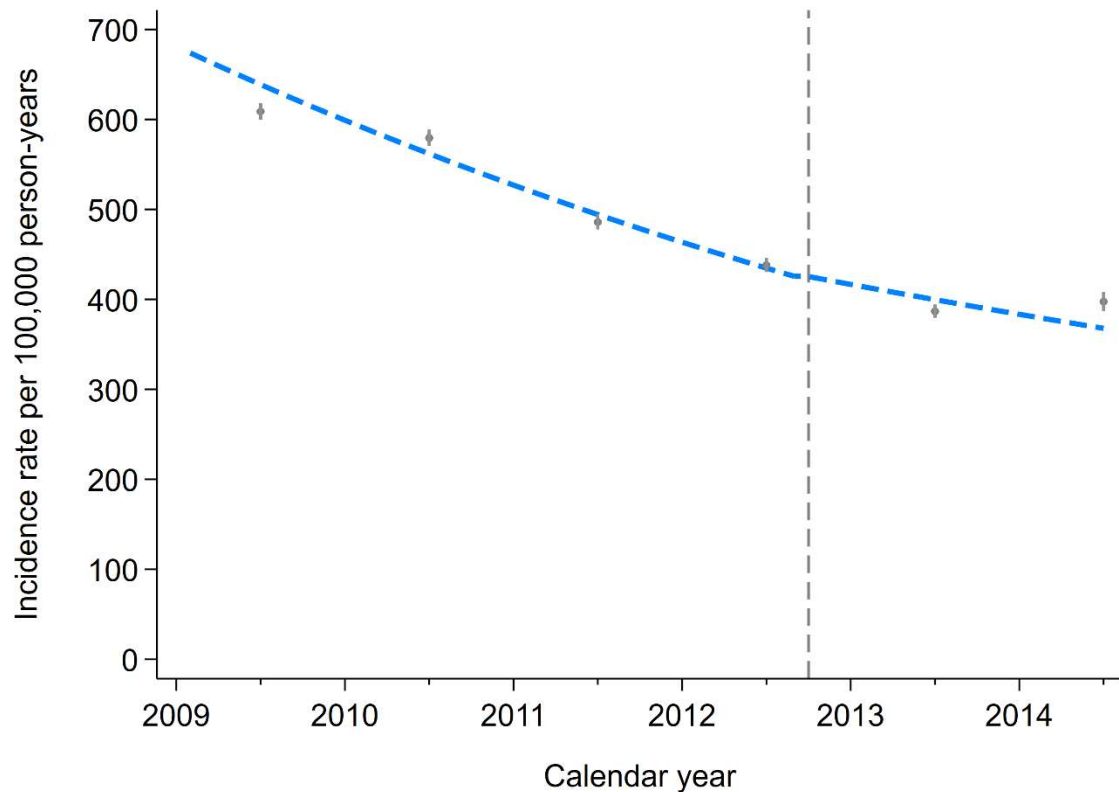

**ESM Fig. 6.** Time trends incidence of diagnosed type 2 diabetes in Norway before and after HbA<sub>1c</sub> was recommended for diagnosis of diabetes in clinical practice. From September 2012 (vertical grey dashed line), HbA<sub>1c</sub> was recommended for diagnosis of diabetes in Norway. There was a significant slope change ( $p=0.001$ ) from September 2012. From Poisson regression modelling (see ESM methods for details), the estimated decline in incidence rate per calendar year was 12.0% from 2009 to August 2012, and 7.9% per year thereafter. The blue line is the predicted incidence rate from a Poisson model with incidence of type 2 diabetes for each calendar month from 2009 to 2014. The grey dots are observed incidence rates (not based on modelling) in each calendar year with 95% confidence intervals represented by vertical bars (these are placed mid-year on the x-axis).

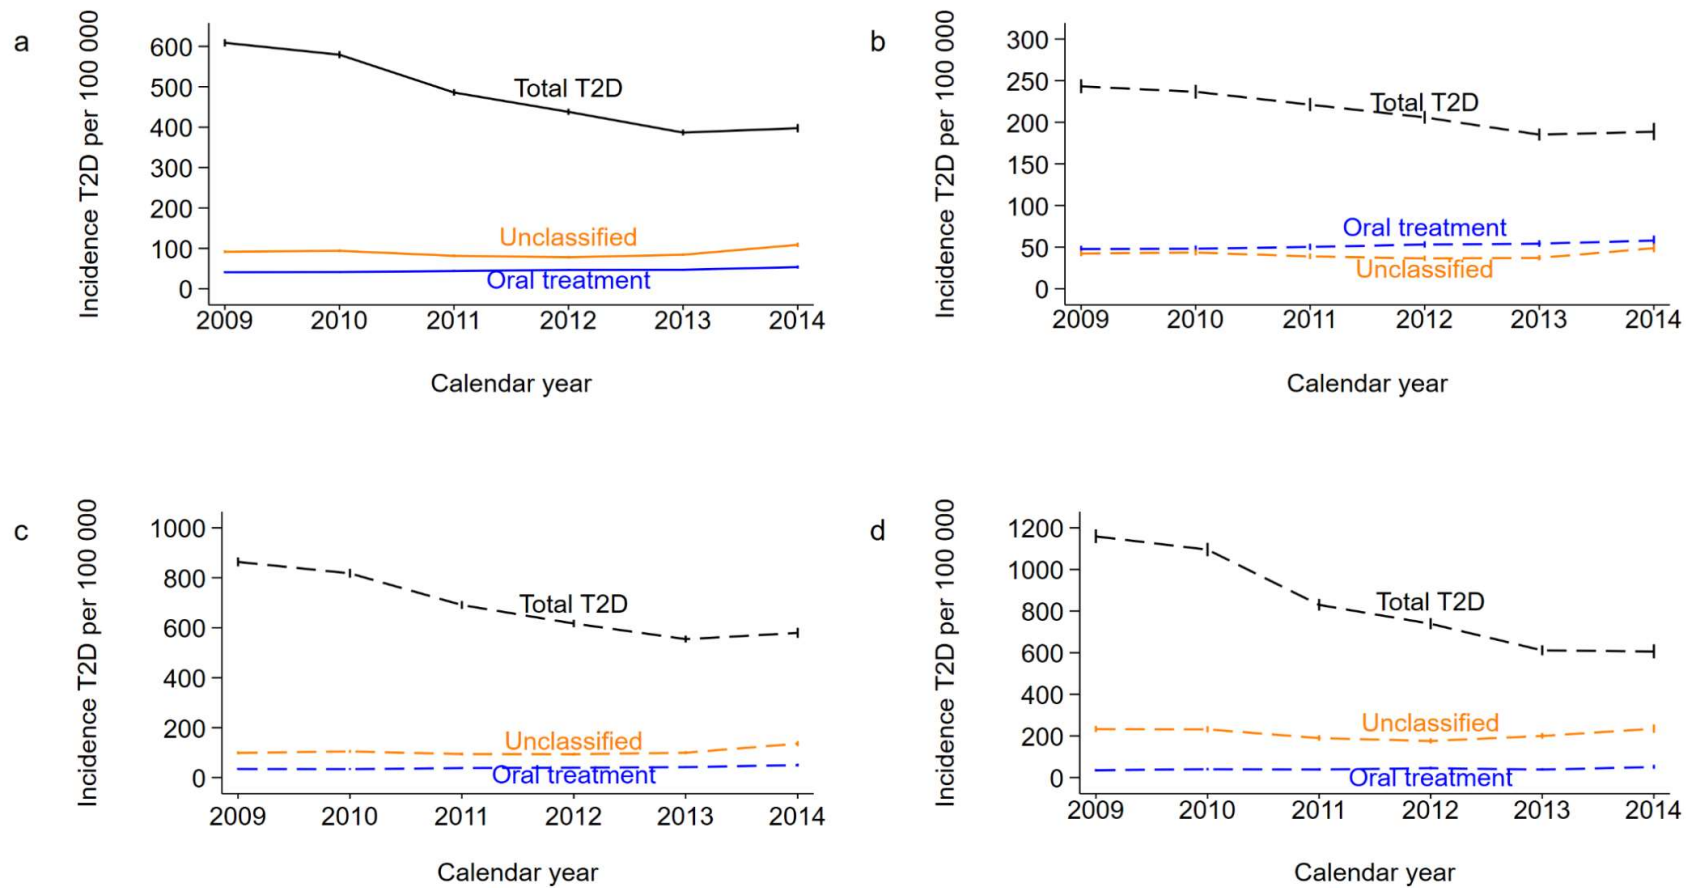

**ESM Fig. 7.** Sensitivity analysis of misclassification of diabetes. Incidence trends in type 2 diabetes among those included in the study (total T2D in black) and those excluded in our algorithm (unclassified (orange) or those treated with A10B without a registered diabetes diagnosis (blue, denoted oral treatment)). a) All age groups, b) Aged 30 to 49 years, c) Aged 50 to 69 years and d) Aged 70 to 89 years. Vertical bars represent 95% confidence intervals.
